# Supplementary material
Source: PubMed Central journal article supplement (PMC7864380)
Supplement: NIHMS1653110-supplement-Supplementary_Appendix_1.pdf [file NIHMS1653110-supplement-Supplementary_Appendix_1.pdf]

| <b>Supplementary Appendix: Complication categories, examples and ICD 9/10 code</b> |                                                                                                                                                                                                                     |                                                                                                                                                                                                                                                                                                                                                                                                                                                                                         |
|------------------------------------------------------------------------------------|---------------------------------------------------------------------------------------------------------------------------------------------------------------------------------------------------------------------|-----------------------------------------------------------------------------------------------------------------------------------------------------------------------------------------------------------------------------------------------------------------------------------------------------------------------------------------------------------------------------------------------------------------------------------------------------------------------------------------|
| <b>Complication category</b>                                                       | <b>Complication example</b>                                                                                                                                                                                         | <b>ICD9/10 code</b>                                                                                                                                                                                                                                                                                                                                                                                                                                                                     |
| Hemorrhage/bleeding                                                                | Hemorrhage complicating procedure, acute hemorrhagic anemia, hematoma, blood transfusion, iron deficiency anemia secondary to blood loss                                                                            | ICD9: V58.2, 998.1, 998.11, 998.12, 285.1, 39.98, 54.12, 39.41, 39.49, 34.43, 99.00, 99.02, 99.03, 99.04, 459.0, 568.81, 99811, 280, 285.9<br>ICD10: D500, D62, 30233H0, 30233N0, 30243H0, 30243N0, 30253H0, 30253N0, 30263H0, 30233H1, 30243H1, 30253H1, 30263H1, 30233N1, 30233P1, 30243N1, 30243P1, 30253N1, 30253P1, 30263N1, 30263P1, N9962, N99820, N99821, R58                                                                                                                   |
| Cardiac                                                                            | Myocardial infarction, hypertensive disease with heart failure, heart failure, supraventricular tachycardia, atrial fibrillation, cardiac arrest, cardiogenic shock                                                 | ICD9: 410.1, 410.2, 410.3, 410.4, 410.5, 410.6, 410.7, 410.8, 410.9, 402.01, 402.11, 402.91, 428.xx, 4260, 4270, 4271, 272, 42731, 42732, 42741, 42742, 4279, 427.5, 997.1, 785.51<br>ICD10: I21.09, I21.19, I21.11, I21.29, I21.4, I21.3, I11.0, I50.9, I442, I470, I471, I472, I479, I480, I481, I482, I483, I484, I4891, I4892, I4901, I4902, I499, I46.9, I97.88, I97.89                                                                                                            |
| Respiratory                                                                        | Atelectasis, pneumonia (any type) and ventilator associated pneumonia, pneumothorax, transfusion related acute lung injury, chronic respiratory failure with hypoxia, acute respiratory failure with hypoxia        | ICD9: 518, 514, 518.4, 518.5, 518.82, 466.xx, 480.xx, 481, 482.xx, 483.xx, 485, 486, 507.0, 799.1, 512.1, 518.7, 997.3, 518.81, 518.84, 997.3x, 483.x, 484.x, 507.x, 997.31, 997.39<br>ICD10: J90, J918, 81.0, 80, J95821, J95822, J9600, J9601, J9602, J9690, J9691, J9692, J9610, J9611, J9620, J9621, J9622, J13, J14, J150, J151, J1520, J15211, J15212, J1529, J153, J154, J155, J156, J158, J159, J180, J181, J182, J188, J189, J95851, J95859, J690, J698, R09.2, J95811, J95.84 |
| Gastrointestinal                                                                   | Paralytic ileus, nausea/vomiting, diarrhea, constipation, small bowel obstruction<br>GI bleed, gastric or duodenal ulcer, bowel leak                                                                                | ICD9: 530.82, 531.0x, 531.1x, 531.2x, 531.4x, 531.6x, 532.0x, 532.1x, 532.2x, 532.4x, 532.6x, 533.0x, 533.1x, 533.2x, 533.4x, 533.6x, 534.0x, 534.1x, 534.2x, 534.4x, 534.6x, 535.x1, 578.9, 997.4, 560, 560.0, 560.2, 560.2, 560.3x, 560.8, 560.81, 560.89, 560.9<br>ICD10: K56.x, K20.x, K21.x, K22.x, K22.11, K22.8, K25.x, K26.x, K28.x, K29.6, K28.7, K92.x, K91.3, K91.89, K91.x, K90.8, K90.9                                                                                    |
| Genitourinary                                                                      | Renal or perinephric abscess, urine leak, urinary obstruction, urinary fistula, hematuria, other post procedural complications and disorders of GU systems, stoma complications: parastomal hernia, stomal ischemia | ICD9: 593.82, 596.1, 596.2, 596.3, 997.5, 593.8x, 442.1, 997.72, 445.81, 902.4x, V44.6, V55.6, 866.xx, 867.x, 868.14, 868.04, 599.1, 619.0, 788.8, 567.89, 55.12, 55.21, 55.22, 55.29, 55.8x, 55.92, 55.93, 55.94, 87.73, 87.74, 88.75, 88.45, 97.61, 97.62, 56.0, 56.31, 56.39, 56.8x, 56.6x, 56.74, 56.75, 56.79, 57.0, 57.93, 57.32, 59.0x, 59.2x, 59.92, 59.93, 590.3, 46.4, 56.52, 599.6x, 593.3, 593.4, 593.5, 591, 5848, 9975, 55.0, 55.02, 55.03, 59.8, 56.72                   |

|                      |                                                                                                                                                                                                                           |                                                                                                                                                                                                                                                                                                                                                                                                                                                                                                                                                                                                                                    |
|----------------------|---------------------------------------------------------------------------------------------------------------------------------------------------------------------------------------------------------------------------|------------------------------------------------------------------------------------------------------------------------------------------------------------------------------------------------------------------------------------------------------------------------------------------------------------------------------------------------------------------------------------------------------------------------------------------------------------------------------------------------------------------------------------------------------------------------------------------------------------------------------------|
|                      |                                                                                                                                                                                                                           | ICD10: N2889, N321, N322, N323, N99.89, N134, N1330, N138, OT9000Z, OT9070Z, OT9080Z, OT9100Z, OT9170Z, OT9030Z, OT9040Z, OT9130Z, OT9140Z, OTC03ZZ, OTC04ZZ, OTC13ZZ, OTC14ZZ, OT760DZ, OT763DZ, OT764DZ, OT767DZ, OT768DZ, OT770DZ, OT773Z, OT774DZ, OT777DZ, OT780DZ, OT783DZ, OT784DZ, OT787DZ, OT788DZ, OT9600Z, OT9630Z, OT9640Z, OT9670Z, OT9680Z, OT9740Z, OT9770Z, OT9780Z, OT9800Z, OT9830Z, OT9840Z, OT9870Z, OT9880Z, OTQ60ZZ, OTQ63ZZ, OTQ64ZZ, OTQ67ZZ, OTQ68ZZ, OTQ73ZZ, OTQ77ZZ, OTQ78ZZ, OT9700Z, OT9730Z                                                                                                         |
| Wound and hernia     | Wound seroma, wound infection, poor wound healing, secondary intention healing, wound dehiscence, fascial dehiscence and/or evisceration, abdominal wall hernia, incisional hernia                                        | ICD9: 879.2, 998.31, 998.32, 998.83, 998.3, 998.5, 998.59, 998.51, 998.6, 958.3, 998.3x, 998.5x, 54.61, 54.62, 54.63, 54.72, 86.04, 86.05, 86.22, 86.28, 551.9, 552.8, 552.9, 553.9, 553.21, 53.5, 53.51, 53.59, 53.6, 53.61, 53.62, 53.63, 53.69<br>ICD10: OJQ80ZZ, OJQ83ZZ, OJR807Z, OJR80KZ, OJR837Z, OJR83JZ, OJR83KZ, OJU807Z, OJU80JZ, OJU80KZ, OJU837Z, OJU83JZ, OJU83KZ, OJBC0ZX, OJBC0ZZ, OJBC3ZX, OJBC3ZZ, T8131XA, T8131XD, T8131XS, T8130XA, T8130XD, T8130XS, T8132XA, T8132XD, T8132XS, K43.3, K43.4, K43.5, K450, K461, K460, K469, OWQF0ZZ, OWQF3ZZ, OWQF4ZZ, OWUF07Z, OWUF0JZ, OWUF0KZ, OWUF47Z, OWUF4JZ, OWUF4KZ |
| Thrombosis/embolic   | Phlebitis, thrombosis of vein or artery, deep vein thrombosis, pulmonary embolism                                                                                                                                         | ICD9: 415.1, 451.1x, 451.2, 451.81, 451.9, 453.8, 453.9, 997.2, 999.2, 444.22, 444.81, 451.11, 451.19, 453.40, 453.41, 415.11, 415.13, 415.19<br>ICD10: I2602, I2609, I269, I2699, I8010, I8012, I8013, I80201, I80202, I80291, I80292, I80293, I80299, I82401, I82402, I82403, I82409, I82411, I82412, I80203, I80209, I80211, I80212, I80213, I80219, I80221, I80222, I80223, I80229, I80231, I80232, I80233, I80239, 82413, I82419, I82421, I82422, I82423, I82429, I82431, I82432, I82433, I82439, I824Y1, I824Y2, I824Y3, I824Y9, I743, I74.5, I8011                                                                          |
| Infection and sepsis | Pyelonephritis, unspecified kidney infection, urinary tract infection, peritoneal abscess, necrotizing fasciitis, clostridium difficile, drainage of abscess, MRSA sepsis, septic shock, postoperative sepsis, bacteremia | ICD9: 590.2, 580.8, 590.80, 590.1, 590.81, 590.00, 590.11, 038.0, 038.2, 038.3, 038.4, 038.8, 038.9, 996.64, 599.0, 590.9, 567.22, 686.8, 686.9, 728.86, 009.1, 008.45, 567, 567.1, 567.2x, 567.3x, 567.81, 567.82, 567.9, 320.xx, 510.x, 513.x, 519.2, 683, 038.xx, 785.52, 785.50, 785.59, 998.0, 995.91, 995.92, 996.62, 999.3, 999.31, 790.7<br>ICD10: T814XXA, N12, N16, N110, N10, A409, R7881, T83510, N390, K651, A021, A400, A401, A403, A4101, A4102, A411, A412, A413, A414, A4150, A4151, A4152, A4153, A4159, A4181, A4189, A419, A427, A5486, B37,                                                                   |

|                                                                       |                                                                                                                                                                                                                         |                                                                                                                                                                                                                                                                                                                                                                                        |
|-----------------------------------------------------------------------|-------------------------------------------------------------------------------------------------------------------------------------------------------------------------------------------------------------------------|----------------------------------------------------------------------------------------------------------------------------------------------------------------------------------------------------------------------------------------------------------------------------------------------------------------------------------------------------------------------------------------|
|                                                                       |                                                                                                                                                                                                                         | R6520, R6521, L0889, L089, M726, A09, A047, A0471, A0472, 0D9W30Z, 0D9W3ZZ, 0D9W40Z, 0D9W4ZZ, W9J30Z, OW9J3ZZ, OH97X0Z, OH97XZZ, OH9AX0Z, OH9AXZZ, OJ9800Z, OJ980ZZ, OJ9B00Z, OJ9B0ZZ, OJ9C00Z, OJ9C0ZZ, OW9M00Z, OW9M0ZZ, OW9M30Z, OW9M4ZZ, OJC80Z, OJC83ZZ, OJCB0ZZ, OJCB3Z, OJCC0ZZ, OJCC3ZZ, A40.x, A41.x, R65.xx, T80.2, T80.21, T80.219, R78.81, T8112                           |
| Renal failure, metabolic disturbances, dehydration, FTT, malnutrition | Renal failure, acute kidney injury, acute kidney failure, dialysis catheter placement, acidosis, volume depletion, dehydration, electrolyte disorders (hypokalemia, hyponatremia, etc), malnutrition, failure to thrive | ICD9: 586, 584, v45.1x, v56.0, v56.1, 38.95, 39.27, 39.95, 54.98, 55.6, 276.2, 276.5, 276.51, 276.9, E87.3, 263.9, 263.1, 263, 263.2, 263.8, 783.7<br>ICD10: 0TQ77ZZ, 0TQ78ZZ, 0T9700Z, 0T9730Z, 5A1D70Z, 5A1D80Z, 5A1D90Z, 3E1M39Z, E872, E860, E878, R62.7                                                                                                                           |
| Neurologic                                                            | Subarachnoid, subdural or intracranial hemorrhage; occlusion or stenosis of cerebral artery – no thrombosis, ischemic or hemorrhagic stroke, neuropathy                                                                 | ICD9: 436, 434.91, 434.11, 434.01, 997.01, 997.02, 997.0x, 433.xx, 434.xx, 430, 431, 432.1, 432.9, 997.09, 356.8<br>ICD10: I6789, I635, I6340, I6330, G9781, G9782, I97811, I97821, I65, I63, I66, I60, I61, I62, G97.81, G603, G62                                                                                                                                                    |
| Miscellaneous and surgical                                            | Lymphocele, lower extremity swelling, lymphedema, uncontrolled pain, accidental cut/puncture/perforation, intraoperative repair of colon or small bowel (bowel injury), unspecified surgical complication               | ICD9: 39.79, E870.0, 998.8, 998.89, 998.9, 999.9, E878.8, E878.9, 997.9, 999.4, 999.5, 999.6, 999.7, 999.8x, e876.x, e878.x, e911, e912, e879.x, 997.99<br>ICD10: T8183XA, T8189XA, T819XXA, T888XXA, T889XXA, Y838, Y839, Y840, 0DQF3ZZ, 0DQF4ZZ, 0DQF7ZZ, 0DQF8ZZ, 0DQG4ZZ, 0DQK3ZZ, 0DQK4ZZ, 0DQK7ZZ, 0DQK8ZZ, 0DQL3ZZ, 0DQL4ZZ, 0DQL7ZZ, 0DQL8ZZ, 0DQM3ZZ, 0DQM4ZZ, 0DQM7ZZ, I89.8 |
