# Supplementary material
Source: PubMed Central journal article supplement (PMC7864380)
Supplement: NIHMS1653110-supplement-Supplementary_Table_1.pdf [file NIHMS1653110-supplement-Supplementary_Table_1.pdf]

**Supplementary Table:** Full report of categorical complications true positive, true negative, false positives and false negatives comparing manual chart review (referent) to coding data.

|                                                                       | <b>Patients <i>with</i> complication recorded in chart review and coding data (True-positives)</b> | <b>Patients <i>without</i> complication recorded in chart review and coding data (True-negatives)</b> | <b>Patients <i>with</i> complications recorded in coding data that are absent in chart review (False-positives)</b> | <b>Patients <i>without</i> a complications recorded in coding data that are in chart review (False-negatives)</b> |
|-----------------------------------------------------------------------|----------------------------------------------------------------------------------------------------|-------------------------------------------------------------------------------------------------------|---------------------------------------------------------------------------------------------------------------------|-------------------------------------------------------------------------------------------------------------------|
| <b>Category of complication, No. (%)</b>                              |                                                                                                    |                                                                                                       |                                                                                                                     |                                                                                                                   |
| Hemorrhage/bleeding                                                   | 3 (1)                                                                                              | 252 (94)                                                                                              | 7 (3)                                                                                                               | 6 (2)                                                                                                             |
| Cardiovascular                                                        | 2 (1)                                                                                              | 250 (93)                                                                                              | 14 (5)                                                                                                              | 2 (1)                                                                                                             |
| Respiratory                                                           | 1 (<0.5)                                                                                           | 258 (96)                                                                                              | 2 (1)                                                                                                               | 7 (3)                                                                                                             |
| Gastrointestinal                                                      | 2 (1)                                                                                              | 226 (84)                                                                                              | 7 (3)                                                                                                               | 33 (12)                                                                                                           |
| Genitourinary                                                         | 1 (<0.5)                                                                                           | 238 (89)                                                                                              | 16 (6)                                                                                                              | 13 (5)                                                                                                            |
| Wound/hernia                                                          | 10 (4)                                                                                             | 230 (86)                                                                                              | 14 (5)                                                                                                              | 14 (5)                                                                                                            |
| Thrombosis/embolic                                                    | 1 (<0.5)                                                                                           | 254 (95)                                                                                              | 1 (<0.5)                                                                                                            | 12 (4)                                                                                                            |
| infection/sepsis                                                      | 17 (6)                                                                                             | 192 (72)                                                                                              | 11 (4)                                                                                                              | 48 (18)                                                                                                           |
| ARF, acidosis, FTT                                                    | 8 (3)                                                                                              | 229 (85)                                                                                              | 13 (5)                                                                                                              | 18 (7)                                                                                                            |
| Neurologic                                                            | -                                                                                                  | 264 (98)                                                                                              | -                                                                                                                   | 4 (2)                                                                                                             |
| Misc. Surgical                                                        | 0                                                                                                  | 240 (90)                                                                                              | 15 (6)                                                                                                              | 13 (5)                                                                                                            |
| ARF, acute renal failure; FTT, failure to thrive; Misc, miscellaneous |                                                                                                    |                                                                                                       |                                                                                                                     |                                                                                                                   |
